# Supplementary material for: Genetic manipulation and immortalized culture of ex vivo primary human germinal center B cells
Source: Springer Nature journal article supplement (doi:10.1038/s41596-021-00506-4), 2021-04-09
Supplement: MOESM2 [file 41596_2021_506_MOESM2_ESM19.pdf]

## Reporting Summary

Nature Research wishes to improve the reproducibility of the work that we publish. This form provides structure for consistency and transparency in reporting. For further information on Nature Research policies, see [Authors & Referees](#) and the [Editorial Policy Checklist](#).

### Statistics

For all statistical analyses, confirm that the following items are present in the figure legend, table legend, main text, or Methods section.

n/a Confirmed

- ☐ ☒ The exact sample size ( $n$ ) for each experimental group/condition, given as a discrete number and unit of measurement
- ☐ ☒ A statement on whether measurements were taken from distinct samples or whether the same sample was measured repeatedly
- ☒ ☐ The statistical test(s) used AND whether they are one- or two-sided  
*Only common tests should be described solely by name; describe more complex techniques in the Methods section.*
- ☒ ☐ A description of all covariates tested
- ☒ ☐ A description of any assumptions or corrections, such as tests of normality and adjustment for multiple comparisons
- ☒ ☐ A full description of the statistical parameters including central tendency (e.g. means) or other basic estimates (e.g. regression coefficient) AND variation (e.g. standard deviation) or associated estimates of uncertainty (e.g. confidence intervals)
- ☒ ☐ For null hypothesis testing, the test statistic (e.g.  $F$ ,  $t$ ,  $r$ ) with confidence intervals, effect sizes, degrees of freedom and  $P$  value noted  
*Give  $P$  values as exact values whenever suitable.*
- ☒ ☐ For Bayesian analysis, information on the choice of priors and Markov chain Monte Carlo settings
- ☒ ☐ For hierarchical and complex designs, identification of the appropriate level for tests and full reporting of outcomes
- ☒ ☐ Estimates of effect sizes (e.g. Cohen's  $d$ , Pearson's  $r$ ), indicating how they were calculated

*Our web collection on [statistics for biologists](#) contains articles on many of the points above.*

### Software and code

Policy information about [availability of computer code](#)

Data collection

BD LSR2

Data analysis

FlowJo v.10.4.2

For manuscripts utilizing custom algorithms or software that are central to the research but not yet described in published literature, software must be made available to editors/reviewers. We strongly encourage code deposition in a community repository (e.g. GitHub). See the Nature Research [guidelines for submitting code & software](#) for further information.

### Data

Policy information about [availability of data](#)

All manuscripts must include a [data availability statement](#). This statement should provide the following information, where applicable:

- Accession codes, unique identifiers, or web links for publicly available datasets
- A list of figures that have associated raw data
- A description of any restrictions on data availability

All data will be made available upon reasonable request.

### Field-specific reporting

Please select the one below that is the best fit for your research. If you are not sure, read the appropriate sections before making your selection.

- ☒ Life sciences ☐ Behavioural & social sciences ☐ Ecological, evolutionary & environmental sciences

For a reference copy of the document with all sections, see [nature.com/documents/nr-reporting-summary-flat.pdf](https://www.nature.com/documents/nr-reporting-summary-flat.pdf)

# Life sciences study design

All studies must disclose on these points even when the disclosure is negative.

|                 |    |
|-----------------|----|
| Sample size     | NA |
| Data exclusions | NA |
| Replication     | NA |
| Randomization   | NA |
| Blinding        | NA |

## Reporting for specific materials, systems and methods

We require information from authors about some types of materials, experimental systems and methods used in many studies. Here, indicate whether each material, system or method listed is relevant to your study. If you are not sure if a list item applies to your research, read the appropriate section before selecting a response.

### Materials & experimental systems

|                                     |                                                                 |
|-------------------------------------|-----------------------------------------------------------------|
| n/a                                 | Involved in the study                                           |
| <input type="checkbox"/>            | <input checked="" type="checkbox"/> Antibodies                  |
| <input checked="" type="checkbox"/> | <input type="checkbox"/> Eukaryotic cell lines                  |
| <input checked="" type="checkbox"/> | <input type="checkbox"/> Palaeontology                          |
| <input type="checkbox"/>            | <input checked="" type="checkbox"/> Animals and other organisms |
| <input checked="" type="checkbox"/> | <input type="checkbox"/> Human research participants            |
| <input checked="" type="checkbox"/> | <input type="checkbox"/> Clinical data                          |

### Methods

|                                     |                                                    |
|-------------------------------------|----------------------------------------------------|
| n/a                                 | Involved in the study                              |
| <input checked="" type="checkbox"/> | <input type="checkbox"/> ChIP-seq                  |
| <input type="checkbox"/>            | <input checked="" type="checkbox"/> Flow cytometry |
| <input checked="" type="checkbox"/> | <input type="checkbox"/> MRI-based neuroimaging    |

## Antibodies

|                 |                                                                                                                                                                                                                                                                                                                                                                                                                                                                                                                                                                                                                                                                                                                                                      |
|-----------------|------------------------------------------------------------------------------------------------------------------------------------------------------------------------------------------------------------------------------------------------------------------------------------------------------------------------------------------------------------------------------------------------------------------------------------------------------------------------------------------------------------------------------------------------------------------------------------------------------------------------------------------------------------------------------------------------------------------------------------------------------|
| Antibodies used | All antibodies used in this study are commercially available and have been validated by the manufacturer. A complete list of antibodies, including catalog number, is provided in the manuscript.                                                                                                                                                                                                                                                                                                                                                                                                                                                                                                                                                    |
| Validation      | <ul style="list-style-type: none"> <li>• CD38 Mouse anti-Human, PE, Clone: HB7 (ebioscience, cat.no. 12-0388-42, RRID AB_1518748)</li> <li>• CD38-APC (17-0389-42 ThermoFisher Scientific, RRID AB_1834353)</li> <li>• CD19-PE (302254 Biolegend, RRID AB_2564142)</li> <li>• CD19-APC (302212, Biolegend, RRID AB_314242)</li> <li>• CD20 Mouse anti-Human, APC, Clone: 2H7 (ebioscience, cat.no. 17-0209-41, RRID AB_10670628)</li> <li>• Brilliant Violet 421 anti-human CD19 Antibody [Clone: HIB19] (BioLegend, cat.no. 302234, RRID AB_11142678)</li> <li>• CD10 Mouse anti-Human, APC, Clone: 97C5 (MiltenyiBiotec, cat.no. 130-119-675, RRID AB_2733329)</li> <li>• DAPI (422801, Biolegend)</li> <li>• 7-AAD (420403, Biolegend)</li> </ul> |

## Animals and other organisms

Policy information about [studies involving animals](#); [ARRIVE guidelines](#) recommended for reporting animal research

|                         |                                                                                                                                                                                                                        |
|-------------------------|------------------------------------------------------------------------------------------------------------------------------------------------------------------------------------------------------------------------|
| Laboratory animals      | All animals used were NSG (non-obese diabetic/severe combined immunodeficient/common gamma chain deficient).                                                                                                           |
| Wild animals            | No wild animals were utilized during the course of these studies.                                                                                                                                                      |
| Field-collected samples | No field-collected samples were utilized during the course of these studies.                                                                                                                                           |
| Ethics oversight        | This research has been regulated under the Animals (Scientific Procedures) Act 1986 Amendment Regulations 2012 following ethical review by the University of Cambridge Animal Welfare and Ethical Review Body (AWERB). |

Note that full information on the approval of the study protocol must also be provided in the manuscript.

# Flow Cytometry

## Plots

Confirm that:

- ☒ The axis labels state the marker and fluorochrome used (e.g. CD4-FITC).
- ☒ The axis scales are clearly visible. Include numbers along axes only for bottom left plot of group (a 'group' is an analysis of identical markers).
- ☒ All plots are contour plots with outliers or pseudocolor plots.
- ☒ A numerical value for number of cells or percentage (with statistics) is provided.

## Methodology

Sample preparation

Cells were prepared as follows unless otherwise stated:  
Cells used in co-cultures assays were gently de-attached from feeders by pipetting, with care used to not remove feeders, collected and washed (500 x g, 5 min) several times with PBS and filtered before staining for relevant markers. For analysis, cells were resuspended in PBS with 2% FBS.

Instrument

BD Biosciences LSR2

Software

BD FACS Diva 6.1.3 software was used to collect flow cytometry data. FlowJo 10.0.8 software was used for the analysis of flow cytometry data.

Cell population abundance

Purity of magnetic-bead purified GC B cells as well as GC B cells transduced were analyzed by staining for CD38, CD20, CD10 and CD19. Generally, more than 10,000 events were collected.

Gating strategy

Live cells were gated using FSC/SSC parameters and a viability marker. Positive cells for a marker were gated using nontransduced negative controls. Gating Strategy can be found in Supplementary Figure 3.

- ☒ Tick this box to confirm that a figure exemplifying the gating strategy is provided in the Supplementary Information.
